# Supplementary material for: Synthesis of metastable chromium carbide nanomaterials and their electrocatalytic activity for the hydrogen evolution reaction
Source: Royal Society of Chemistry journal article supplement (doi:10.1039/c7dt01404j), 2017-01-01
Supplement: c7dt01404j1.pdf [file c7dt01404j1.pdf]

## Synthesis of Metastable Chromium Carbide Nanomaterials and their Electrocatalytic Activity for the Hydrogen Evolution Reaction

Samantha M Schmuecker, Dale Clouser, Theodore J Kraus, and Brian M Leonard\*

Department of Chemistry, University of Wyoming, Laramie, Wyoming, United States.

### Supporting Information

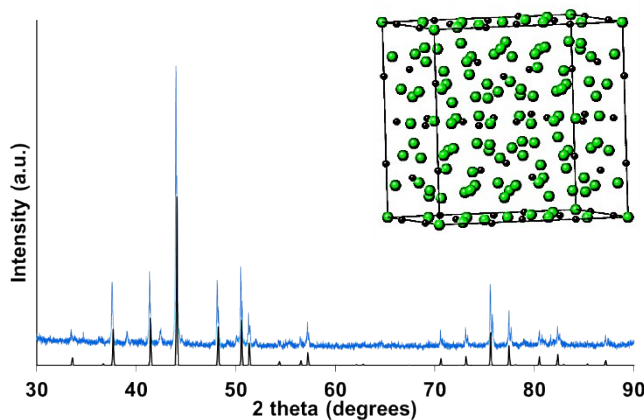

**Figure S1.** XRD of  $\text{Cr}_{23}\text{C}_6$  with calculated  $\text{Cr}_{23}\text{C}_6$  PDF# 00-035-0783

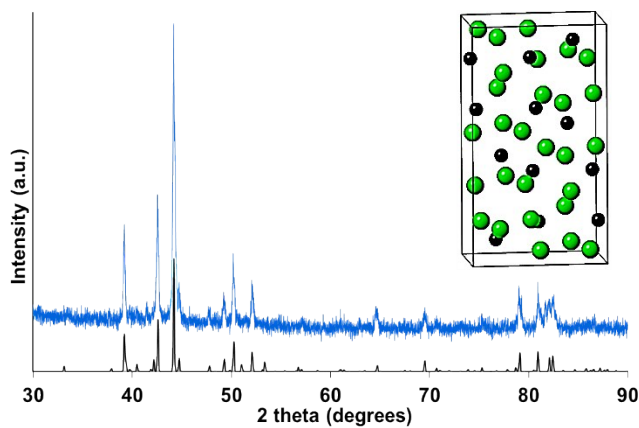

**Figure S2.** XRD of  $\text{Cr}_7\text{C}_3$  with calculated  $\text{Cr}_7\text{C}_3$  PDF# 00-036-1482

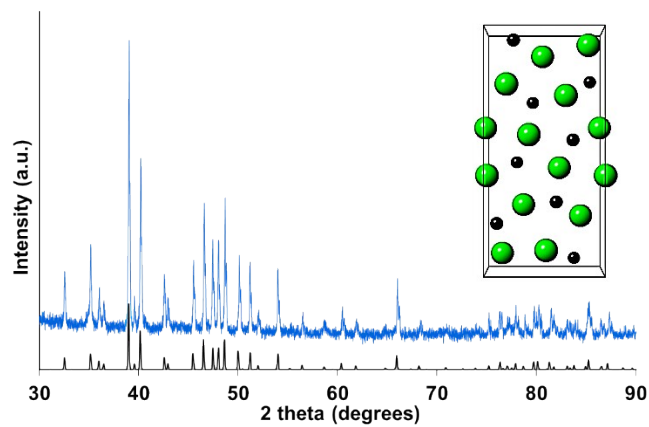

**Figure S3.** XRD of  $\text{Cr}_3\text{C}_2$  with calculated  $\text{Cr}_3\text{C}_2$  PDF# 01-074-7137

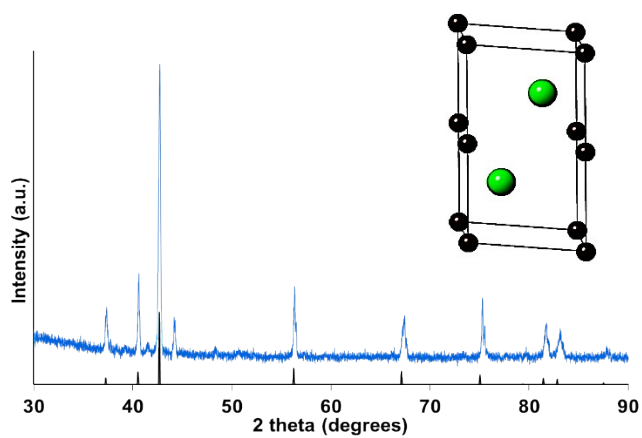

**Figure S4.** XRD of  $\text{Cr}_2\text{C}$  with calculated  $\text{Cr}_2\text{C}$  PDF# 00-014-0519

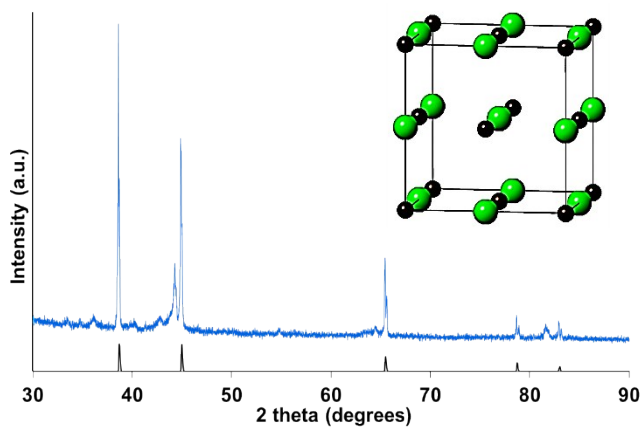

**Figure S5.** XRD of  $\text{CrC}$  with calculated  $\text{CrC}$  PDF# 03-065-0896

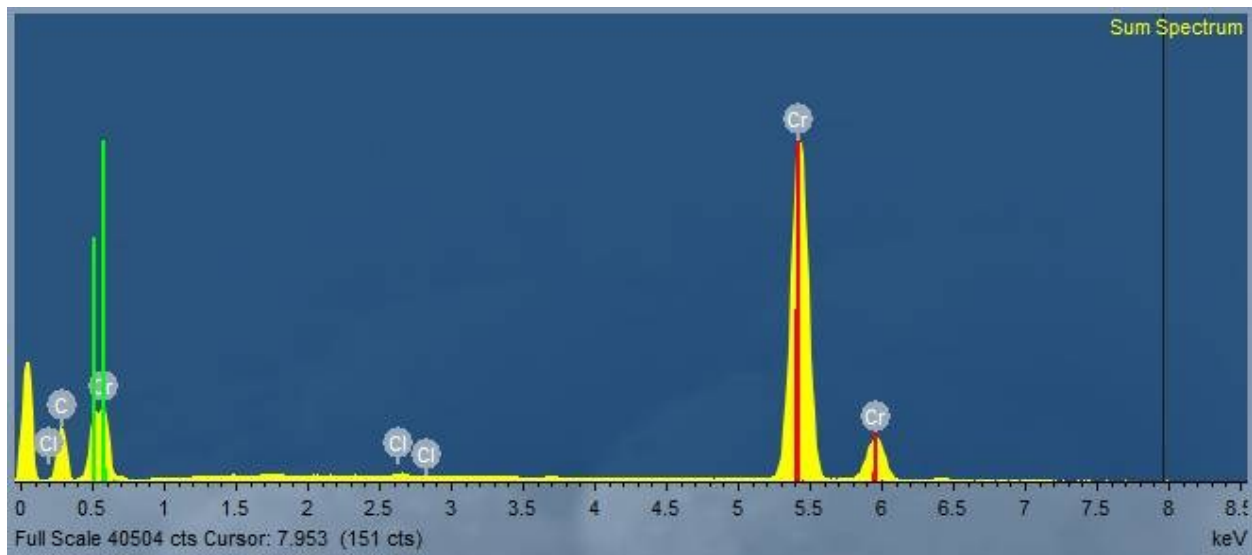

**Figure S6.** EDS spectrum of CrC with Cl peaks highlighted.

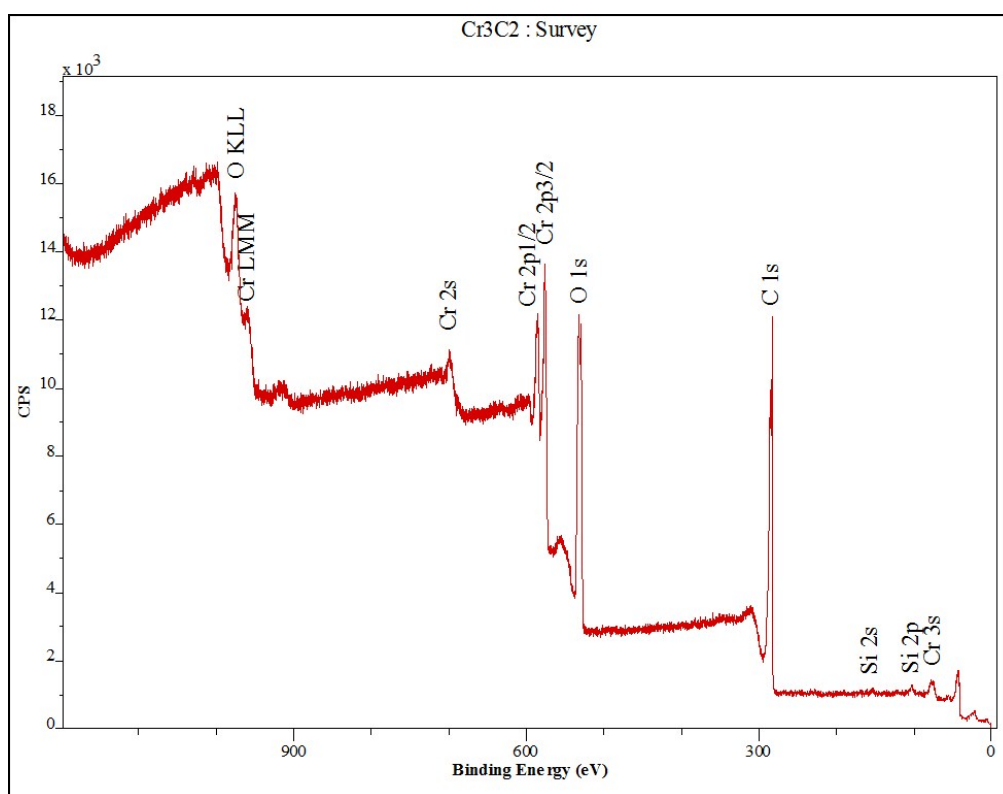

**Figure S7.** XPS survey spectrum of Cr<sub>3</sub>C<sub>2</sub>

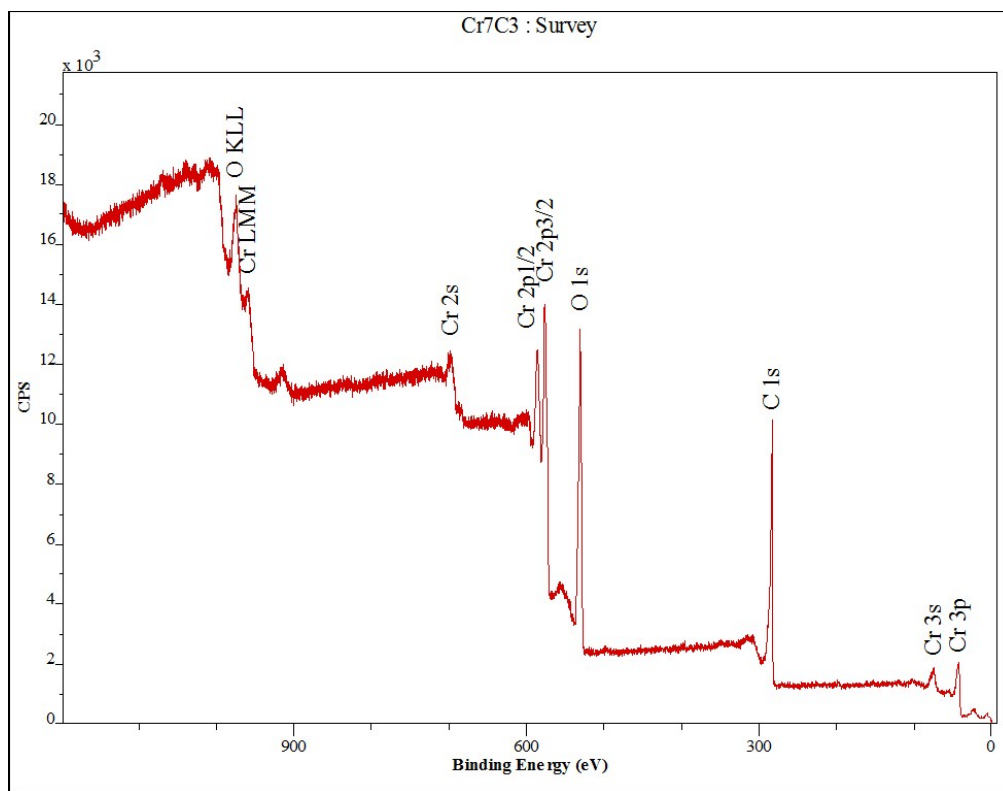

Figure S8. XPS survey spectrum of Cr<sub>7</sub>C<sub>3</sub>

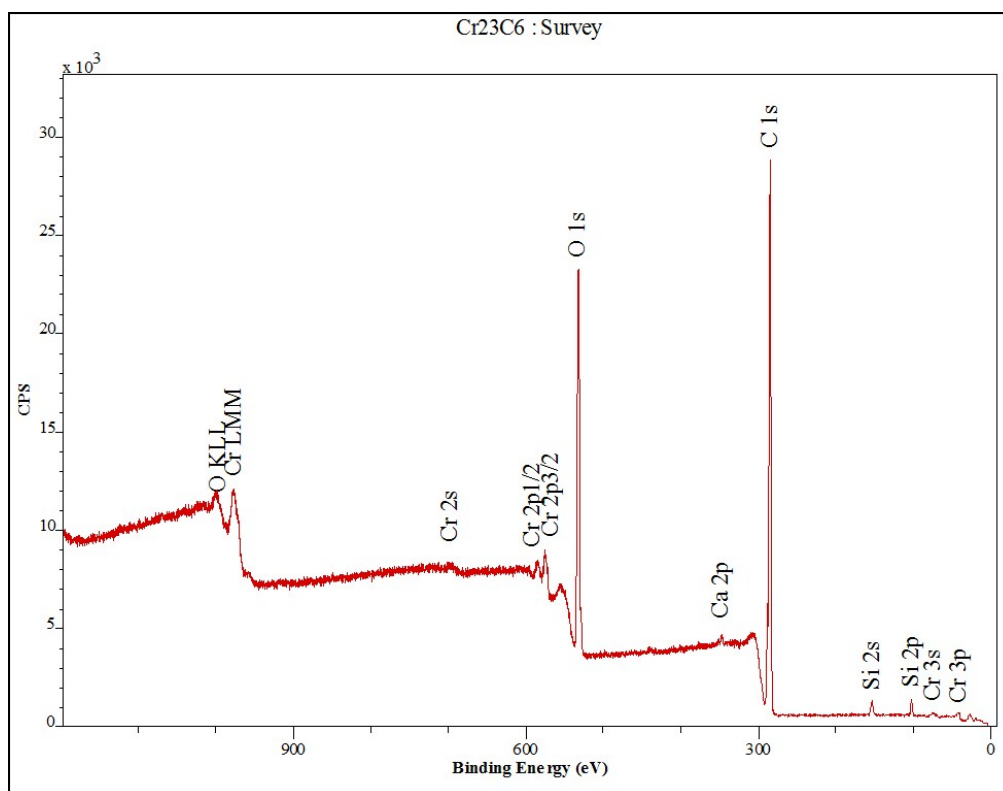

Figure S9. XPS survey spectrum of Cr<sub>23</sub>C<sub>6</sub>

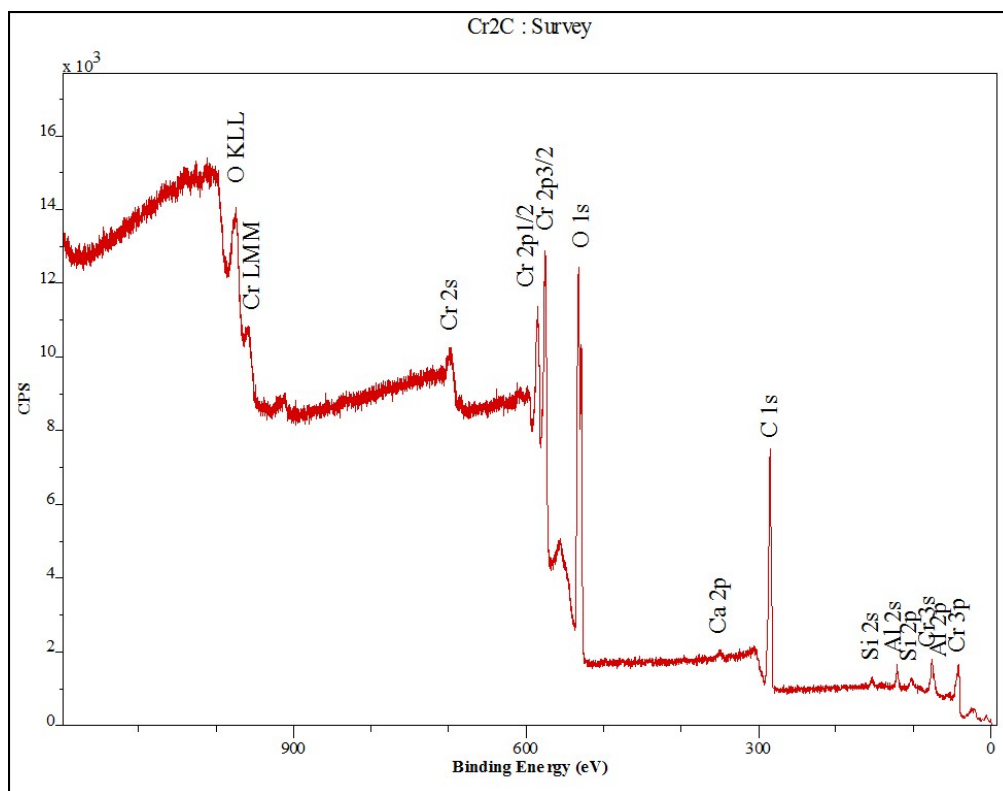

Figure S10. XPS survey spectrum of Cr<sub>2</sub>C

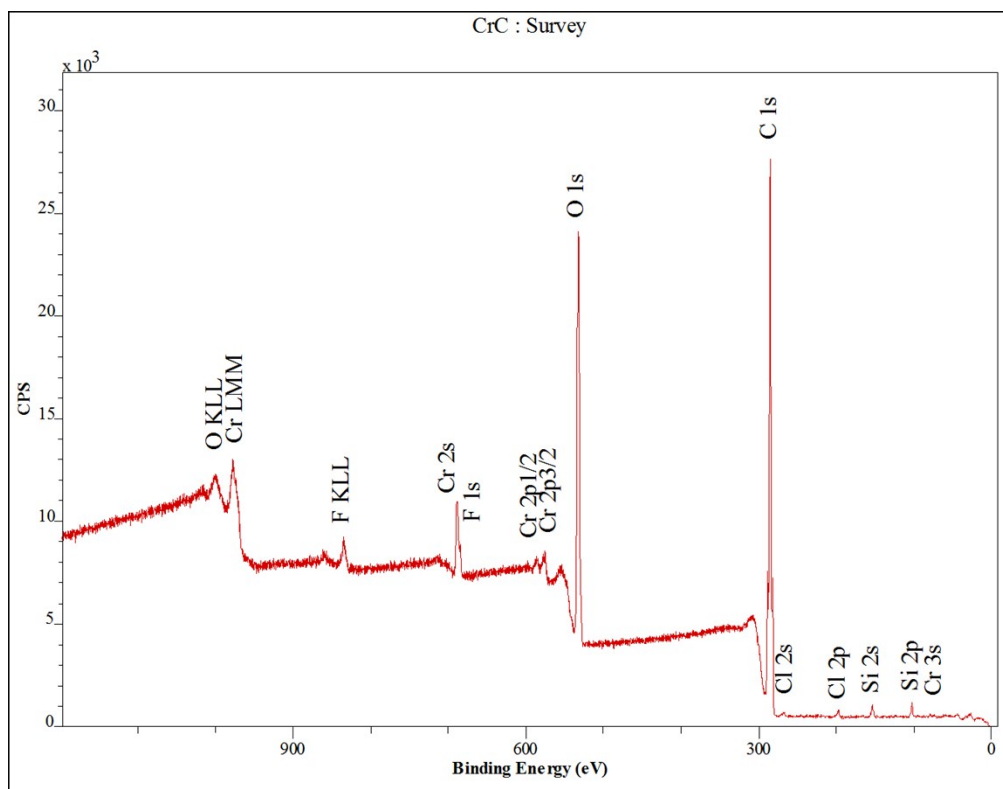

Figure S11. XPS survey spectrum of CrC

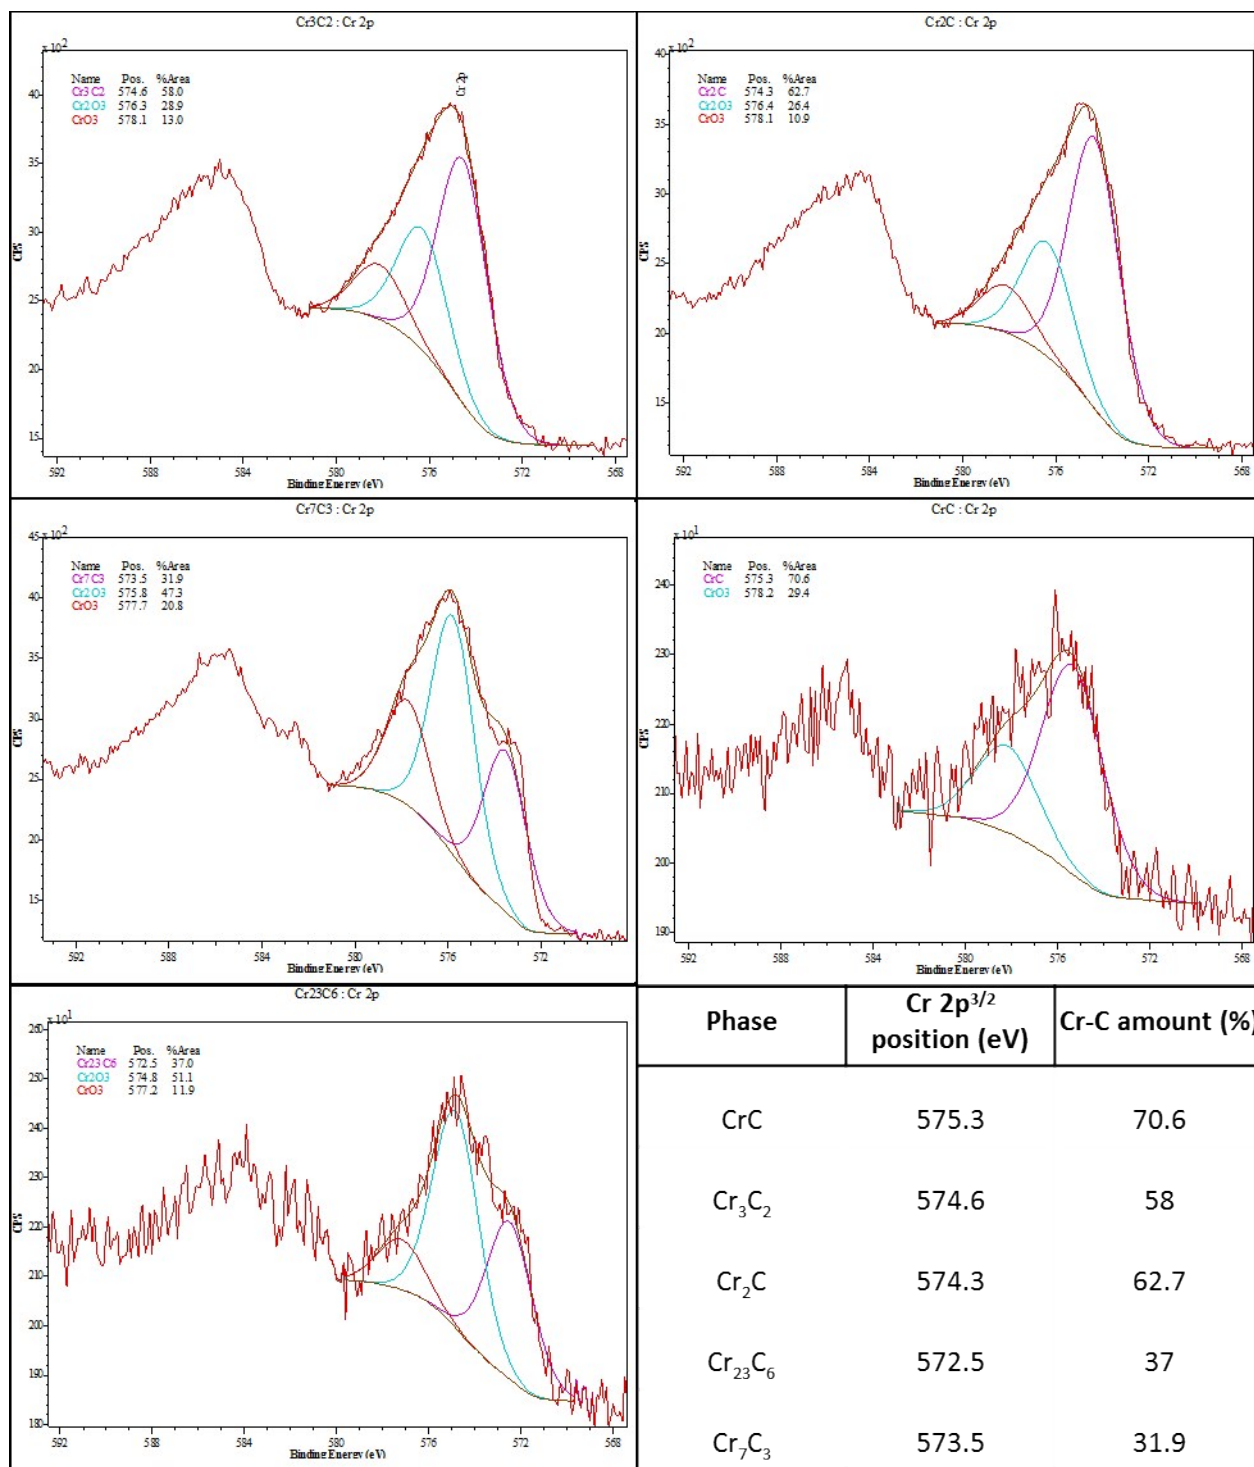

Figure S12. High resolution XPS Cr 2p spectra and table of results

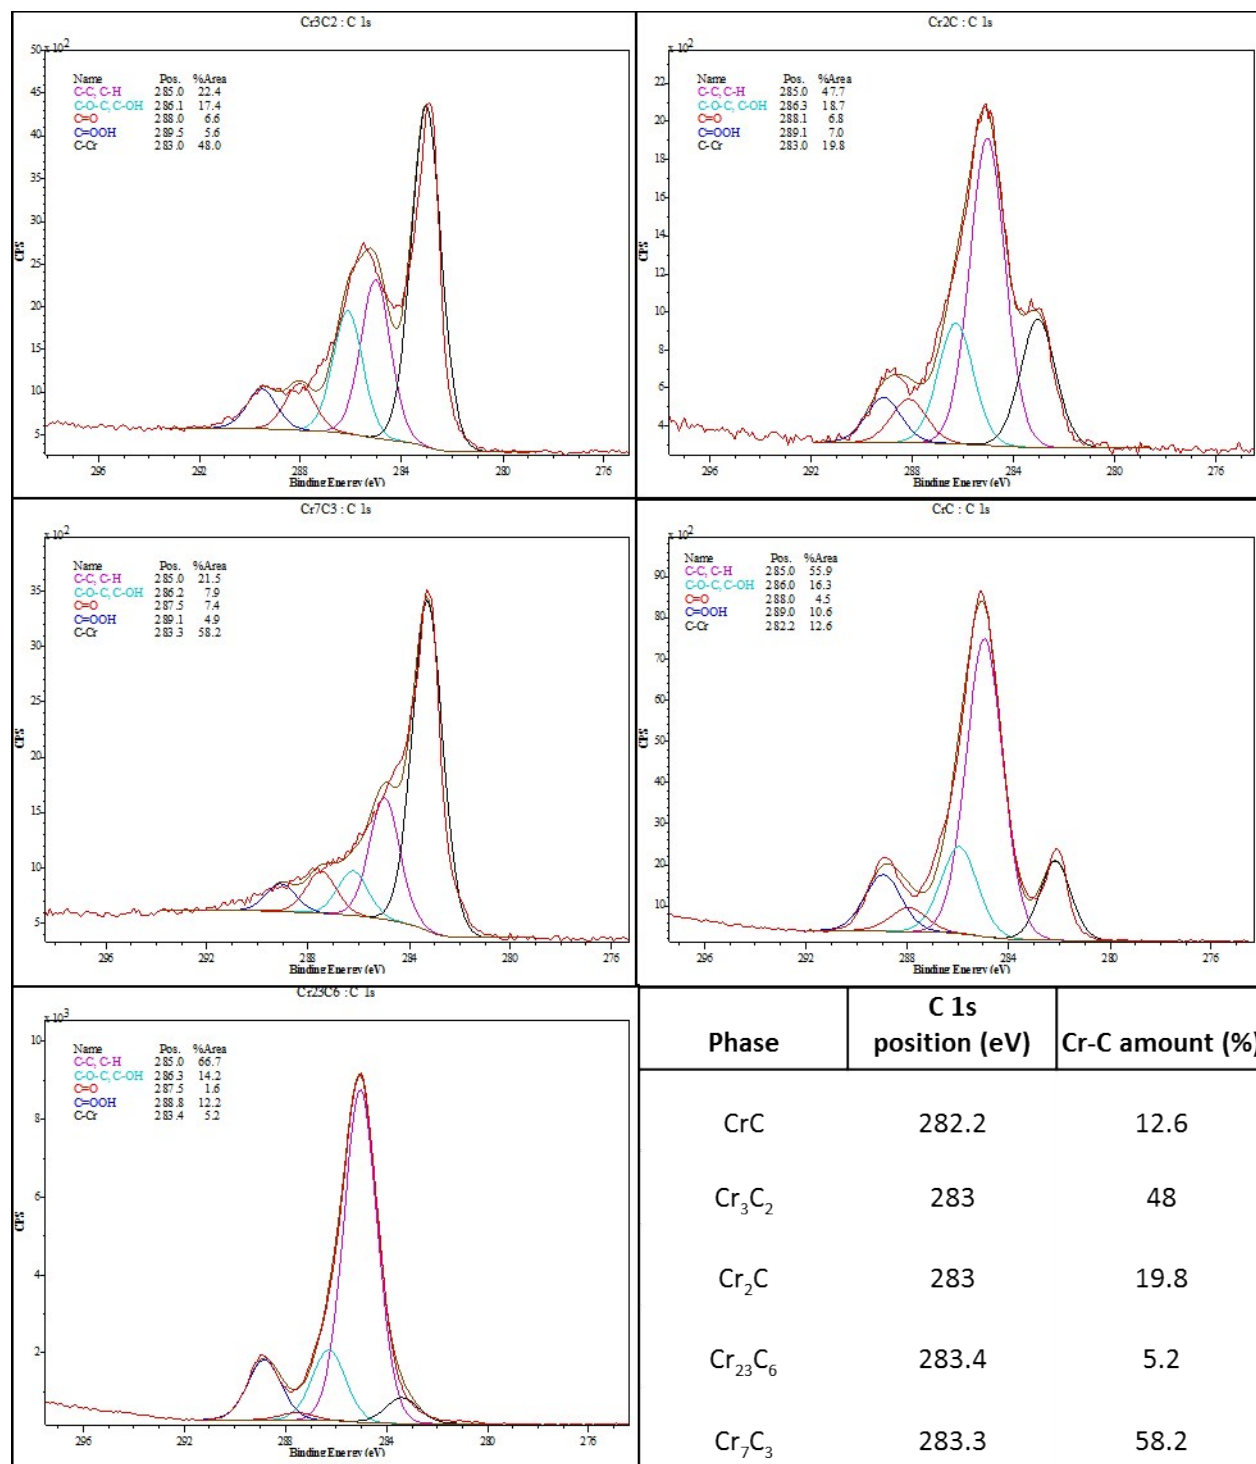

Figure S13. High resolution XPS C 1s spectra and table of results

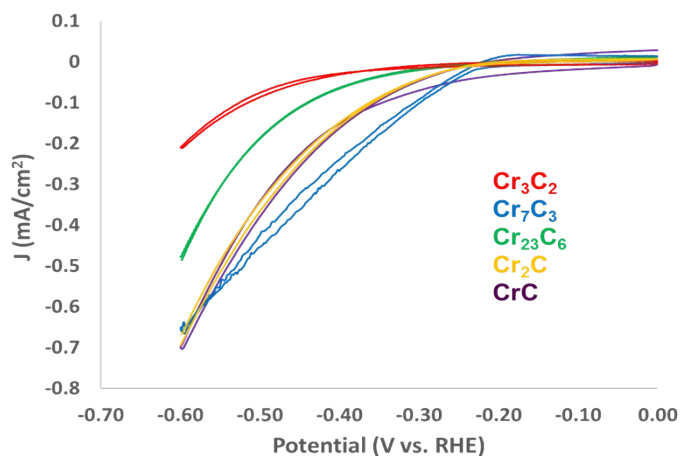

**Figure S14.** Cyclic Voltammetry (CV) curves for all five phases of chromium carbide in 0.5 M H<sub>2</sub>SO<sub>4</sub>. The catalyst loading for all is 0.28 mg/cm<sup>2</sup>. (Color of phase label correlates with color of each CV curve.)

**Table S1.** Comparison of all five crystal structures through coordination environments of C and Cr (Cr# indicating crystallographic site), (Cr-C and Cr-Cr) bonding types, Cr XPS values, DOS<sup>1</sup>, and current density for HER.

| Structure                       | Cr-Coordination                                      | Cr-C bonding                                        | Cr-Cr bonding                                       | Bonding type            | XPS Cr 2p <sup>3/2</sup> | Cr:C | DOS at Fermi level | Current Density (mA/cm <sup>2</sup> ) |
|---------------------------------|------------------------------------------------------|-----------------------------------------------------|-----------------------------------------------------|-------------------------|--------------------------|------|--------------------|---------------------------------------|
| Cr <sub>23</sub> C <sub>6</sub> | Cubooctahedron, cubes with interconnected tetrahedra | Cr1 (0)<br>Cr2 (0)<br>Cr3 (3)<br>Cr4 (2)            | Cr1 (12)<br>Cr2 (4)<br>Cr3 (4)<br>Cr4 (6)           | Metallic Polar-Covalent | 572.5                    | 3.83 | ~20                | -0.917                                |
| Cr <sub>7</sub> C <sub>3</sub>  | Octahedra                                            | Cr1 (3)<br>Cr2 (4)<br>Cr3 (3)<br>Cr4 (3)<br>Cr5 (4) | Cr1 (3)<br>Cr2 (5)<br>Cr3 (1)<br>Cr4 (2)<br>Cr5 (5) | Metallic Polar-Covalent | 573.5                    | 2.33 | ~30                | -1.23                                 |
| Cr <sub>2</sub> C               | Distorted octahedra                                  | Cr (6)                                              | Cr (0)                                              | Polar-Covalent          | 574.3                    | 2    | N/A                | -1.05                                 |
| Cr <sub>3</sub> C <sub>2</sub>  | Octahedra                                            | Cr1 (4)<br>Cr2 (5)<br>Cr3 (5)                       | Cr1 (2)<br>Cr2 (2)<br>Cr3 (6)                       | Polar-covalent Metal    | 574.6                    | 1.5  | ~10                | -0.321                                |
| CrC                             | Octahedra                                            | Cr (6)                                              | Cr (0)                                              | Polar-Covalent          | 575.3                    | 1    | N/A                | -0.853                                |

## References

1. Jiang, C., First-principles study of structural, elastic, and electronic properties of chromium carbides. *Applied Physics Letters* **2008**, 92 (4), 041909
